# Supplementary material for: Structural and functional characterization of peste des petits ruminants virus coded hemagglutinin protein using various in-silico approaches
Source: Frontiers journal article supplement (doi:10.3389/fmicb.2024.1427606), 2024-06-20
Supplement: Data_Sheet_4.PDF [file Data_Sheet_4.PDF]

## A) Measles Virus (MeV)

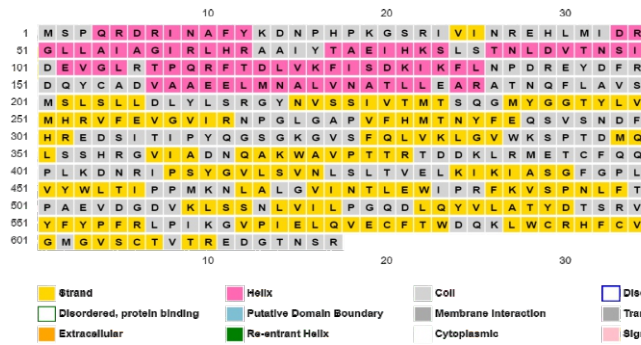

## B) Rinderpest Virus (RPV)

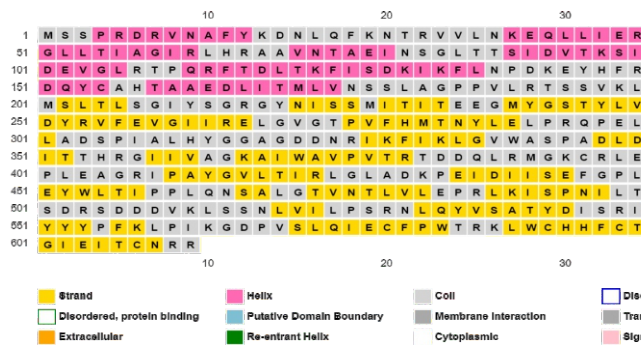

## C) Canine Distemper Virus (CDV)

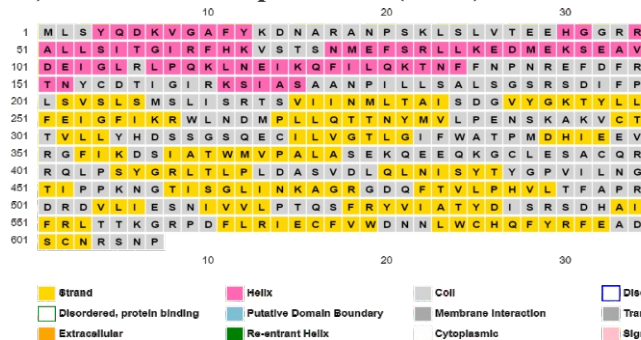

**Supplementary file 4(A):** Secondary structure of the different Hemagglutinin protein of genus *Morbillivirus* predicted using PSIPRED tool.

**Supplementary file 4(B):** % Secondary structure observed in Hemagglutinin protein of members in genus *Morbillivirus* predicted using SOPMA tool.

| <b>Virus</b>                           | <b>Secondary structure</b> | <b>%</b> |
|----------------------------------------|----------------------------|----------|
| Measles virus<br>(AAK64474.1)          | Alpha Helix                | 22.85%   |
|                                        | Beta sheets                | 27.71%   |
|                                        | Turns                      | 4.70%    |
|                                        | Coils                      | 44.73%   |
|                                        |                            |          |
| Canine Distemper virus<br>(CAP17286.1) | Alpha Helix                | 18.29%   |
|                                        | Beta sheets                | 27.35%   |
|                                        | Turns                      | 2.14%    |
|                                        | Coils                      | 52.22%   |
|                                        |                            |          |
| Rinderpest virus<br>(AAD25093.1)       | Alpha Helix                | 19.05%   |
|                                        | Beta sheets                | 28.08%   |
|                                        | Turns                      | 2.96%    |
|                                        | Coils                      | 49.02%   |
|                                        |                            |          |
